# Supplementary material for: Estimates of the basic reproduction number for rubella using seroprevalence data and indicator-based approaches
Source: PubMed Central journal article supplement (PMC8893344; doi:10.1371/journal.pcbi.1008858), 2022-03-03
Supplement: pcbi.1008858.s004.pdf [file pcbi.1008858.s004.pdf]

## Estimates of the mean square error associated with $R_0$ estimates

**Table A:** Estimates of the mean square error associated with  $R_0$  estimates. Column 2 shows the mean square error of  $R_0$ , as calculated using the default approach against  $R_0$  calculated using study-specific seroprevalence data. Columns 2-7 hold the minimum, median, maximum 2.5<sup>th</sup> and 95.5<sup>th</sup> percentiles of the MSE values between the 1000 bootstrap-derived values of  $R_0$  calculated using the regional collection of force of infection bootstrap values and the 1000 bootstrap-derived study-specific  $R_0$  values. The final column holds the MSE between study-specific  $R_0$  and the regional point estimate of  $R_0$ .

|                              | $R_0$ from study-specific seroprevalence data vs default $R_0$ estimate | Min  | 2.5 % | Median | 97.5%  | Max      | $R_0$ from study-specific seroprevalence data vs $R_0$ from regional point estimate of the force of infection |
|------------------------------|-------------------------------------------------------------------------|------|-------|--------|--------|----------|---------------------------------------------------------------------------------------------------------------|
| <b>All countries</b>         | 6.97                                                                    | 4.76 | 7.31  | 16.03  | 125.75 | 1513.39  | 8.31                                                                                                          |
| <b>Africa</b>                | 1.03                                                                    | 0.73 | 1.01  | 2.16   | 16.23  | 65.14    | 2.23                                                                                                          |
| <b>Americas</b>              | 8.72                                                                    | 4.62 | 6.60  | 12.04  | 298.38 | 1992.15  | 9.36                                                                                                          |
| <b>Eastern Mediterranean</b> | 5.01                                                                    | 2.73 | 3.88  | 6.46   | 75.69  | 3183.24  | 4.61                                                                                                          |
| <b>Europe</b>                | 22.56                                                                   | 6.83 | 13.16 | 44.09  | 694.90 | 11359.21 | 28.10                                                                                                         |
| <b>South East Asia</b>       | 4.71                                                                    | 1.33 | 2.38  | 7.65   | 133.70 | 440.50   | 6.14                                                                                                          |
| <b>Western Pacific</b>       | 1.36                                                                    | 0.86 | 1.04  | 2.44   | 18.57  | 281.34   | 1.39                                                                                                          |
