# Supplementary material for: Estimates of the basic reproduction number for rubella using seroprevalence data and indicator-based approaches
Source: PubMed Central journal article supplement (PMC8893344; doi:10.1371/journal.pcbi.1008858), 2022-03-03
Supplement: pcbi.1008858.s008.pdf [file pcbi.1008858.s008.pdf]

## Random forest parameter tuning

For the parameter optimisation results we present in the main test we run a nested cross-validation experiment over a grid spanning 6 parameters and a total of 96 points. We chose these parameters to include following the description in the documentation of scikit-learn documentation (<https://scikit-learn.org/stable/modules/ensemble.html>). The 6 parameters together with their default value (in brackets) and their alternative values are listed below:

- 'bootstrap': [True], False
- 'max\_depth': [None], 10
- 'max\_features': ['auto'], 'sqrt'
- 'min\_samples\_leaf': [1], 2
- 'min\_samples\_split': [2], 4
- 'n\_estimators': [100], 25, 200

In Table A we list the MSE (average, minimum and maximum over the 10 splits) obtained from the nested cross-validation optimisation run for the 96 points of the parameters grid. We also list the rank (average, minimum and maximum over the 10 splits) in terms of the achieved MSE for each grid point. For the 'bootstrap' and 'max\_features' parameters for which the 'TRUE' and 'sqrt' values are performing consistently better. For the other 4 parameters there does not seem to be a clear separation between better and worse performing values.

**Table A:** MSE performance and rank of the 96 parameter sets in the double-loop nested cross-validation experiment. The default parameter setup is in bold font.

| boots trap | max_depth | max_features | min_samples_leaf | min_samples_split | n_estimators | Mean MSE OverSplits | Min MSE OverSplits | Max MSE OverSplits | Mean Rank OverSplits | MinRankOverSplits | MaxRankOverSplits |
|------------|-----------|--------------|------------------|-------------------|--------------|---------------------|--------------------|--------------------|----------------------|-------------------|-------------------|
| TRUE       | 10        | sqrt         | 2                | 2                 | 200          | 8.41                | 8.13               | 8.70               | 4.5                  | 1                 | 11                |
| TRUE       | 10        | sqrt         | 2                | 4                 | 200          | 8.41                | 8.13               | 8.70               | 4.5                  | 1                 | 11                |
| TRUE       | None      | sqrt         | 2                | 2                 | 200          | 8.41                | 8.13               | 8.73               | 4.6                  | 1                 | 9                 |
| TRUE       | None      | sqrt         | 2                | 4                 | 200          | 8.41                | 8.13               | 8.73               | 4.6                  | 1                 | 9                 |
| TRUE       | None      | sqrt         | 2                | 2                 | 100          | 8.46                | 8.10               | 8.76               | 6                    | 1                 | 11                |
| TRUE       | None      | sqrt         | 2                | 4                 | 100          | 8.46                | 8.10               | 8.76               | 6                    | 1                 | 11                |
| TRUE       | 10        | sqrt         | 2                | 2                 | 100          | 8.46                | 8.10               | 8.75               | 7.5                  | 3                 | 12                |
| TRUE       | 10        | sqrt         | 2                | 4                 | 100          | 8.46                | 8.10               | 8.75               | 7.5                  | 3                 | 12                |
| TRUE       | None      | sqrt         | 2                | 2                 | 25           | 8.58                | 8.05               | 9.01               | 11.3                 | 1                 | 33                |
| TRUE       | None      | sqrt         | 2                | 4                 | 25           | 8.58                | 8.05               | 9.01               | 11.3                 | 1                 | 33                |
| TRUE       | 10        | sqrt         | 2                | 2                 | 25           | 8.60                | 8.05               | 8.92               | 12.1                 | 1                 | 30                |
| TRUE       | 10        | sqrt         | 2                | 4                 | 25           | 8.60                | 8.05               | 8.92               | 12.1                 | 1                 | 30                |
| TRUE       | None      | sqrt         | 1                | 4                 | 200          | 8.78                | 8.43               | 9.14               | 16.1                 | 9                 | 26                |
| TRUE       | 10        | sqrt         | 1                | 4                 | 200          | 8.78                | 8.46               | 9.16               | 17.2                 | 9                 | 28                |
| TRUE       | None      | sqrt         | 1                | 4                 | 100          | 8.81                | 8.53               | 9.36               | 17.3                 | 13                | 25                |
| TRUE       | 10        | sqrt         | 1                | 4                 | 100          | 8.80                | 8.53               | 9.37               | 17.9                 | 10                | 28                |
| TRUE       | 10        | auto         | 2                | 2                 | 200          | 8.99                | 8.41               | 9.64               | 22.5                 | 13                | 33                |
| TRUE       | 10        | auto         | 2                | 4                 | 200          | 8.99                | 8.41               | 9.64               | 22.5                 | 13                | 33                |
| TRUE       | None      | auto         | 2                | 2                 | 200          | 8.99                | 8.41               | 9.64               | 22.9                 | 15                | 31                |
| TRUE       | None      | auto         | 2                | 4                 | 200          | 8.99                | 8.41               | 9.64               | 22.9                 | 15                | 31                |
| TRUE       | 10        | auto         | 2                | 2                 | 100          | 9.04                | 8.52               | 9.84               | 23.7                 | 11                | 37                |
| TRUE       | 10        | auto         | 2                | 4                 | 100          | 9.04                | 8.52               | 9.84               | 23.7                 | 11                | 37                |
| TRUE       | None      | auto         | 2                | 2                 | 100          | 9.04                | 8.54               | 9.85               | 24.4                 | 13                | 37                |
| TRUE       | None      | auto         | 2                | 4                 | 100          | 9.04                | 8.54               | 9.85               | 24.4                 | 13                | 37                |
| TRUE       | 10        | sqrt         | 1                | 4                 | 25           | 9.03                | 8.47               | 9.61               | 25.7                 | 9                 | 48                |
| TRUE       | None      | sqrt         | 1                | 4                 | 25           | 9.02                | 8.49               | 9.63               | 26.3                 | 14                | 50                |
| TRUE       | None      | sqrt         | 1                | 2                 | 200          | 9.09                | 8.62               | 9.67               | 27                   | 17                | 36                |
| TRUE       | 10        | sqrt         | 1                | 2                 | 200          | 9.11                | 8.60               | 9.70               | 27.6                 | 14                | 37                |
| TRUE       | None      | sqrt         | 1                | 2                 | 100          | 9.12                | 8.62               | 9.85               | 28                   | 16                | 37                |
| TRUE       | 10        | sqrt         | 1                | 2                 | 100          | 9.15                | 8.64               | 9.94               | 28.4                 | 10                | 38                |
| TRUE       | None      | auto         | 2                | 2                 | 25           | 9.28                | 8.69               | 10.51              | 34.3                 | 3                 | 59                |
| TRUE       | None      | auto         | 2                | 4                 | 25           | 9.28                | 8.69               | 10.51              | 34.3                 | 3                 | 59                |
| TRUE       | 10        | auto         | 2                | 2                 | 25           | 9.28                | 8.65               | 10.49              | 34.6                 | 1                 | 55                |
| TRUE       | 10        | auto         | 2                | 4                 | 25           | 9.28                | 8.65               | 10.49              | 34.6                 | 1                 | 55                |
| TRUE       | 10        | sqrt         | 1                | 2                 | 25           | 9.35                | 8.47               | 10.23              | 36.3                 | 14                | 47                |
| TRUE       | None      | sqrt         | 1                | 2                 | 25           | 9.36                | 8.29               | 10.27              | 37                   | 13                | 58                |
| TRUE       | 10        | auto         | 1                | 4                 | 100          | 9.54                | 8.63               | 10.61              | 41                   | 18                | 54                |
| TRUE       | None      | auto         | 1                | 4                 | 100          | 9.54                | 8.66               | 10.60              | 41.4                 | 23                | 53                |
| TRUE       | 10        | auto         | 1                | 4                 | 25           | 9.64                | 8.55               | 11.55              | 41.8                 | 15                | 68                |

|       |      |      |   |   |     |       |       |       |      |    |    |
|-------|------|------|---|---|-----|-------|-------|-------|------|----|----|
| TRUE  | None | auto | 1 | 4 | 200 | 9.55  | 8.74  | 10.37 | 41.8 | 15 | 55 |
| TRUE  | None | auto | 1 | 4 | 25  | 9.63  | 8.60  | 11.53 | 41.9 | 22 | 67 |
| TRUE  | 10   | auto | 1 | 4 | 200 | 9.55  | 8.77  | 10.39 | 42   | 16 | 56 |
| FALSE | None | sqrt | 2 | 2 | 100 | 9.57  | 9.11  | 10.27 | 43.9 | 27 | 54 |
| FALSE | None | sqrt | 2 | 4 | 100 | 9.57  | 9.11  | 10.27 | 43.9 | 27 | 54 |
| FALSE | 10   | sqrt | 2 | 2 | 100 | 9.57  | 9.11  | 10.16 | 44.1 | 25 | 55 |
| FALSE | 10   | sqrt | 2 | 4 | 100 | 9.57  | 9.11  | 10.16 | 44.1 | 25 | 55 |
| FALSE | None | sqrt | 2 | 2 | 200 | 9.62  | 9.10  | 10.33 | 45.4 | 31 | 59 |
| FALSE | None | sqrt | 2 | 4 | 200 | 9.62  | 9.10  | 10.33 | 45.4 | 31 | 59 |
| FALSE | 10   | sqrt | 2 | 2 | 200 | 9.61  | 9.11  | 10.19 | 45.5 | 29 | 60 |
| FALSE | 10   | sqrt | 2 | 4 | 200 | 9.61  | 9.11  | 10.19 | 45.5 | 29 | 60 |
| FALSE | 10   | sqrt | 2 | 2 | 25  | 9.63  | 9.22  | 10.13 | 47.3 | 21 | 62 |
| FALSE | 10   | sqrt | 2 | 4 | 25  | 9.63  | 9.22  | 10.13 | 47.3 | 21 | 62 |
| FALSE | None | sqrt | 2 | 2 | 25  | 9.66  | 9.02  | 10.10 | 47.8 | 27 | 65 |
| FALSE | None | sqrt | 2 | 4 | 25  | 9.66  | 9.02  | 10.10 | 47.8 | 27 | 65 |
| TRUE  | None | auto | 1 | 2 | 200 | 9.85  | 8.87  | 10.73 | 50.5 | 27 | 60 |
| TRUE  | 10   | auto | 1 | 2 | 200 | 9.85  | 8.92  | 10.76 | 50.7 | 32 | 60 |
| TRUE  | 10   | auto | 1 | 2 | 100 | 9.85  | 9.00  | 11.01 | 51.1 | 36 | 60 |
| TRUE  | None | auto | 1 | 2 | 100 | 9.87  | 8.95  | 11.11 | 51.4 | 35 | 61 |
| TRUE  | None | auto | 1 | 2 | 25  | 10.00 | 8.87  | 12.13 | 52   | 38 | 72 |
| TRUE  | 10   | auto | 1 | 2 | 25  | 9.98  | 8.91  | 11.79 | 52.2 | 40 | 71 |
| FALSE | None | sqrt | 1 | 4 | 100 | 10.41 | 9.18  | 11.67 | 59.5 | 49 | 64 |
| FALSE | None | sqrt | 1 | 4 | 200 | 10.42 | 9.21  | 11.58 | 60.1 | 51 | 64 |
| FALSE | 10   | sqrt | 1 | 4 | 200 | 10.44 | 9.25  | 11.46 | 60.6 | 52 | 66 |
| FALSE | 10   | sqrt | 1 | 4 | 100 | 10.46 | 9.27  | 11.53 | 61.1 | 53 | 67 |
| FALSE | None | sqrt | 1 | 4 | 25  | 10.65 | 9.40  | 11.75 | 62.9 | 59 | 66 |
| FALSE | 10   | sqrt | 1 | 4 | 25  | 10.78 | 9.46  | 12.21 | 64.3 | 61 | 66 |
| FALSE | None | sqrt | 1 | 2 | 100 | 11.18 | 9.84  | 12.58 | 69.3 | 64 | 82 |
| FALSE | None | sqrt | 1 | 2 | 200 | 11.22 | 9.79  | 12.62 | 69.5 | 63 | 83 |
| FALSE | 10   | sqrt | 1 | 2 | 200 | 11.22 | 9.76  | 12.66 | 69.6 | 65 | 81 |
| FALSE | 10   | sqrt | 1 | 2 | 100 | 11.22 | 9.81  | 12.87 | 69.8 | 66 | 80 |
| FALSE | None | sqrt | 1 | 2 | 25  | 11.46 | 9.99  | 13.04 | 71.8 | 67 | 84 |
| FALSE | 10   | sqrt | 1 | 2 | 25  | 11.46 | 9.84  | 13.27 | 72.7 | 65 | 84 |
| FALSE | 10   | auto | 2 | 2 | 25  | 13.16 | 11.36 | 18.22 | 80.8 | 71 | 91 |
| FALSE | 10   | auto | 2 | 4 | 25  | 13.16 | 11.36 | 18.22 | 80.8 | 71 | 91 |
| FALSE | None | auto | 2 | 2 | 25  | 13.14 | 11.42 | 18.00 | 80.8 | 71 | 93 |
| FALSE | None | auto | 2 | 2 | 100 | 13.18 | 11.38 | 18.27 | 80.8 | 73 | 89 |
| FALSE | None | auto | 2 | 4 | 25  | 13.14 | 11.42 | 18.00 | 80.8 | 71 | 93 |
| FALSE | None | auto | 2 | 4 | 100 | 13.18 | 11.38 | 18.27 | 80.8 | 73 | 89 |
| FALSE | 10   | auto | 2 | 2 | 100 | 13.18 | 11.29 | 18.32 | 81.4 | 73 | 95 |
| FALSE | 10   | auto | 2 | 4 | 100 | 13.18 | 11.29 | 18.32 | 81.4 | 73 | 95 |
| FALSE | 10   | auto | 2 | 2 | 200 | 13.19 | 11.24 | 18.41 | 81.6 | 67 | 95 |
| FALSE | 10   | auto | 2 | 4 | 200 | 13.19 | 11.24 | 18.41 | 81.6 | 67 | 95 |
| FALSE | None | auto | 2 | 2 | 200 | 13.19 | 11.30 | 18.42 | 81.6 | 69 | 95 |

|       |      |      |   |   |     |       |       |       |      |    |    |
|-------|------|------|---|---|-----|-------|-------|-------|------|----|----|
| FALSE | None | auto | 2 | 4 | 200 | 13.19 | 11.30 | 18.42 | 81.6 | 69 | 95 |
| FALSE | 10   | auto | 1 | 4 | 25  | 14.99 | 10.81 | 19.30 | 81.8 | 73 | 90 |
| FALSE | None | auto | 1 | 4 | 25  | 14.97 | 10.65 | 19.06 | 82.7 | 73 | 89 |
| FALSE | None | auto | 1 | 4 | 200 | 15.02 | 10.61 | 19.07 | 83.6 | 73 | 89 |
| FALSE | 10   | auto | 1 | 4 | 200 | 15.05 | 10.71 | 19.24 | 83.8 | 76 | 90 |
| FALSE | 10   | auto | 1 | 4 | 100 | 15.07 | 10.69 | 19.27 | 84   | 76 | 90 |
| FALSE | None | auto | 1 | 4 | 100 | 15.03 | 10.62 | 19.05 | 84.1 | 74 | 90 |
| FALSE | 10   | auto | 1 | 2 | 25  | 16.23 | 11.16 | 21.21 | 89.1 | 80 | 96 |
| FALSE | None | auto | 1 | 2 | 25  | 16.26 | 11.22 | 21.05 | 89.3 | 79 | 96 |
| FALSE | None | auto | 1 | 2 | 200 | 16.27 | 11.10 | 21.17 | 89.8 | 79 | 95 |
| FALSE | None | auto | 1 | 2 | 100 | 16.29 | 11.10 | 21.18 | 90.1 | 79 | 96 |
| FALSE | 10   | auto | 1 | 2 | 200 | 16.31 | 11.22 | 21.38 | 90.2 | 81 | 96 |
| FALSE | 10   | auto | 1 | 2 | 100 | 16.33 | 11.25 | 21.43 | 90.9 | 83 | 96 |
